# Supplementary material for: Low solid content mouldable chitin physical hydrogel prepared by atypical rupture-free swelling
Source: Royal Society of Chemistry journal article supplement (doi:10.1039/d3sm01542d), 2024-01-01
Supplement: d3sm01542d1.pdf [file d3sm01542d1.pdf]

## Supporting Information

### **Low solid content moldable chitin physical hydrogel prepared by atypical rupture-free swelling**

Yuto Kaku,<sup>a,b</sup> Satoshi Okada,<sup>c</sup> Shuji Fujisawa,<sup>a</sup> Tsuguyuki Saito,<sup>a</sup> and Noriyuki Isobe

\*b,a

<sup>a</sup> Department of Biomaterial Sciences, Graduate School of Agricultural and Life Sciences, The University of Tokyo, 1-1-1 Yayoi, Bunkyo-ku, Tokyo 113-8657, Japan

<sup>b</sup> Biogeochemistry Research Center, Research Institute for Marine Resources Utilization, Japan Agency for Marine-Earth Science and Technology (JAMSTEC), 2-15 Natsushima-cho, Yokosuka, Kanagawa 237-0061, Japan.

<sup>c</sup> Institute for Extra-cutting-edge Science and Technology Avant-garde Research (X-STAR), Japan Agency for Marine-Earth Science and Technology (JAMSTEC), 2-15 Natsushima-cho, Yokosuka, Kanagawa 237-0061, Japan

\*Corresponding author

E-mail: isoben@jamstec.go.jp

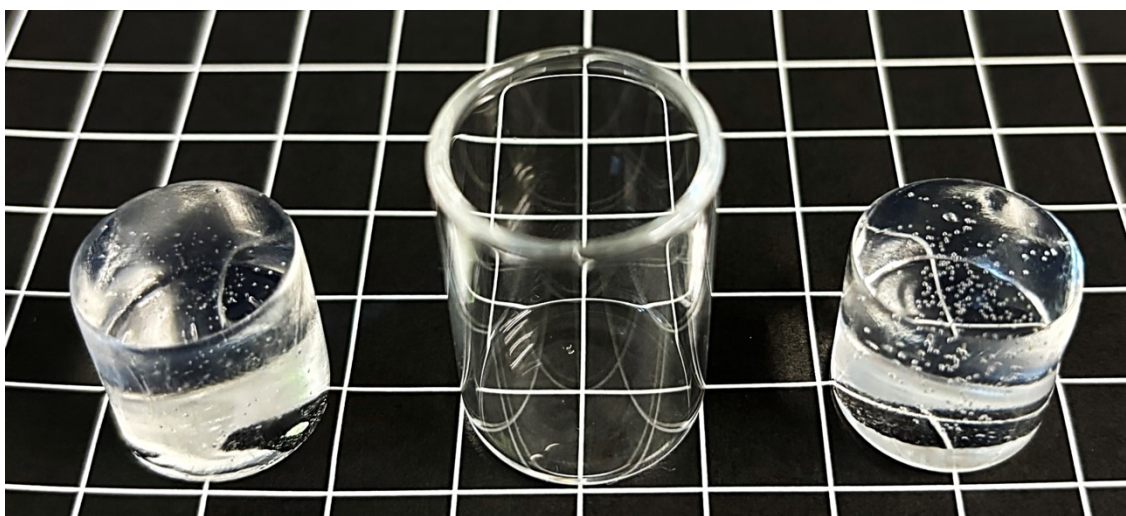

Fig. S1. Photograph of chitin alcogel with sufficient  $\text{Ac}_2\text{O}$  (left, DA = 99.4%), cylindrical mould (centre), chitin alcogel with insufficient  $\text{Ac}_2\text{O}$  (right, DA = 81.7%). The grid square represents 1 cm.

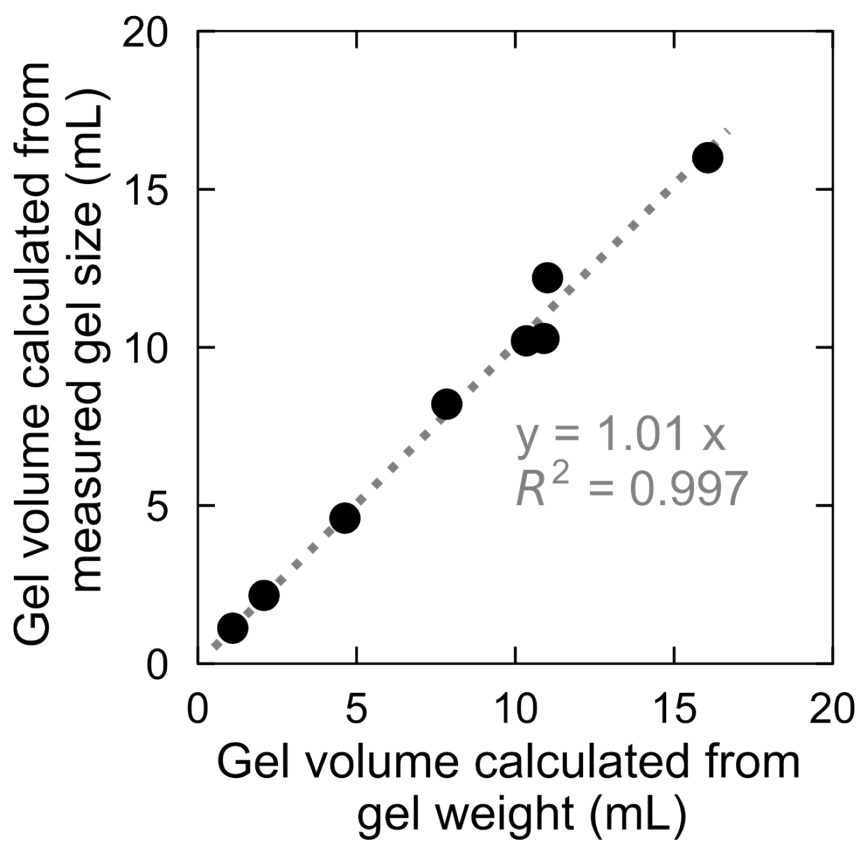

Fig. S2. Correlation of the calculated gel volume from the gel weight and the measured gel size.

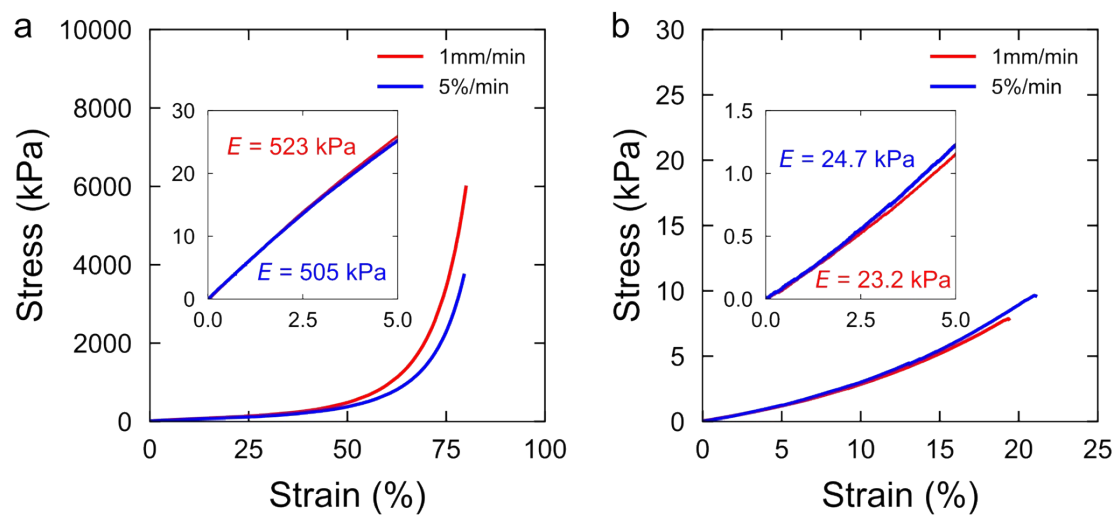

Fig. S3. Stress–strain curves of shrunk (volume change = 19%, DA = 99.4%) and (b) swollen (volume change = 207%, DA = 82.5%) chitin hydrogels measured under different test conditions (1 mm/min or 5% strain/min).

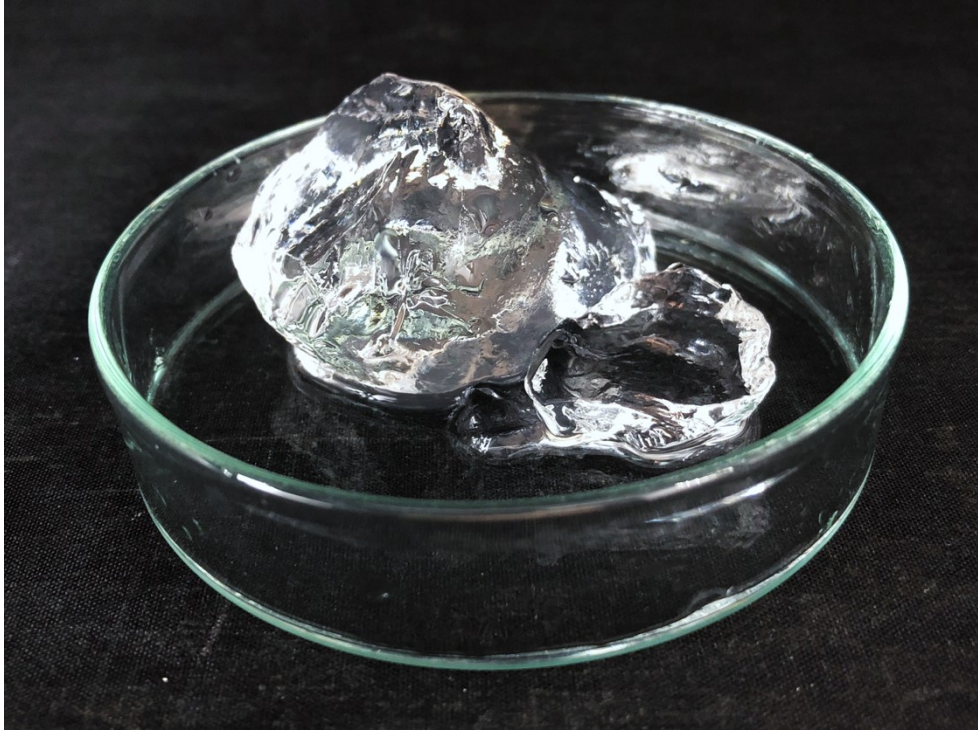

Fig. S4. Photograph of the collapsed chitin hydrogel (DA = 78.8%).

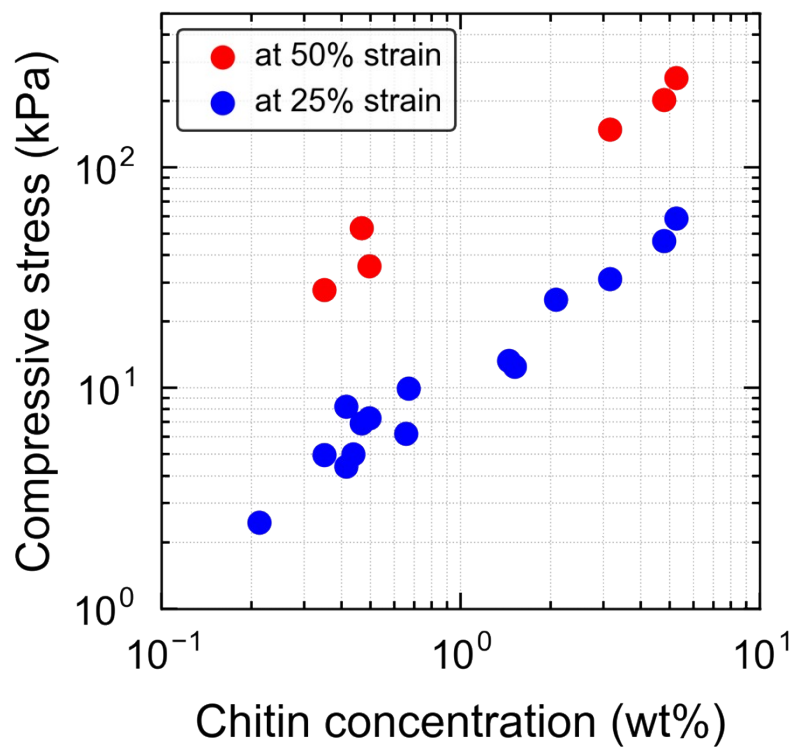

Fig. S5. Compressive stress of the chitin hydrogels at 25% and 50% strain.

| <i>C</i> (wt%) | <i>E</i> (kPa) |
|----------------|----------------|
| 0.212          | 4.22           |
| 0.350          | 15.1           |
| 0.413          | 31.7           |
| 0.413          | 12.8           |
| 0.466          | 23.1           |
| 0.495          | 26.2           |
| 0.656          | 14.2           |
| 0.670          | 23.1           |
| 1.45           | 40.0           |
| 1.51           | 32.6           |
| 2.08           | 80.5           |
| 3.15           | 132            |
| 4.78           | 200            |
| 5.25           | 284            |

Table S1. Gel concentrations (*C*) and compressive moduli (*E*) of the chitin hydrogels.
